# Supplementary material
Source: PubMed Central journal article supplement (PMC6026266)
Supplement: mmc1.pdf [file mmc1.pdf]

## Adult Patients With Bronchiectasis

### A First Look at the US Bronchiectasis Research Registry

*Timothy R. Aksamit, MD; Anne E. O'Donnell, MD; Alan Barker, MD; Kenneth N. Olivier, MD; Kevin L. Winthrop, MD; M. Leigh Anne Daniels, MD, MPH; Margaret Johnson, MD; Edward Eden, MD; David Griffith, MD; Michael Knowles, MD; Mark Metersky, MD; Matthias Salathe, MD; Byron Thomashow, MD; Gregory Tino, MD; Gerard Turino, MD; Betsy Carretta, MPH; and Charles L. Daley, MD; for the Bronchiectasis Research Registry Consortium*

CHEST 2017; 151(5):982-992

*Online supplements are not copyedited prior to posting and the author(s) take full responsibility for the accuracy of all data.*

© 2016 AMERICAN COLLEGE OF CHEST PHYSICIANS. Reproduction of this article is prohibited without written permission from the American College of Chest Physicians. See online for more details. DOI: 10.1016/j.chest.2016.10.055

**e-Appendix 1:****Participating Sites**

Mayo Clinic  
Pulmonary Disease and Critical Care Medicine  
200 First St., SW  
Rochester, MN 55905

Mayo Clinic Florida  
4500 San Pablo Road  
Jacksonville, FL  
32224

Oregon Health and Science University  
Pulmonary and Critical Care Medicine UHN  
Portland, OR 97239

National Jewish Health  
Division of Mycobacterial and Respiratory Infections  
1400 Jackson Street, Room J204  
Denver, CO80206

University of Texas Health Sciences Center at Tyler  
11937 U.S. Hwy. 271  
Tyler, TX 75708-3154

University of North Carolina at Chapel Hill School of Medicine  
7214 Marciso Hall  
125 Mason Farm Road  
CB #7248Chapel Hill, NC 27599-7248

University of Connecticut Health Center  
263 Farmington Avenue  
Farmington, CT 06030

Cardiopulmonary Branch / NHLBI  
National Institutes of Health  
10 Center Drive, Room 6-3152  
Bethesda, MD 20892

Georgetown University Hospital  
3800 Reservoir Road, NW  
Washington, DC 20007

University of Miami, Miller School of Medicine  
1600 NW 10th Avenue, Room RMSB 7056  
Miami, FL 33136

Columbia University Medical Center - NY Presbyterian Hospital  
Center for Chest Disease  
622 W. 168th Street  
New York, NY10032

University of Pennsylvania  
Pulmonary, Allergy & Critical Care  
825 West Gates Building  
3400 Spruce Street  
Philadelphia, PA  
19104

Columbia University  
St. Luke's Roosevelt Hospital, Dept. of Medicine  
1000 10<sup>th</sup> Avenue  
New York, NY 10019

**Author affiliations:**

**Aksamit, Timothy, MD**

Mayo Clinic  
Pulmonary Disease and Critical Care Medicine  
200 First St., SW  
Rochester, MN 55905  
Center Phone: (507) 284-2511  
Email: aksamit.timothy@mayo.edu

**Barker, Alan, MD**

Oregon Health and Science University  
3375 SW Terwilliger Blvd  
Portland, OR 97239  
Email: barkera@ohsu.edu

**Carretta, Betsy, MPH, PMP**

Collaborative Studies Coordinating Center: UNC at Chapel Hill  
137 E. Franklin Street, Suite 203  
Chapel Hill, NC  
27514-4145  
Center Phone: (919) 962-6971  
Email: betsy.carretta@unc.edu

**Site Coordinator**

Wilkins, Tania\*  
Senior Biostatistician  
UNC Dept. of Biostatistics  
Collaborative Studies Coordinating Center  
137 E. Franklin St., Ste. 203, CB# 8030  
Chapel Hill, NC 27514  
Email: wilkinst@email.unc.edu

**Daley, Charles L., MD**

National Jewish Health  
Division of Mycobacterial and Respiratory Infections  
1400 Jackson Street, Room J204  
Denver, CO80206  
Center Phone: (303) 388-4461  
Email: DaleyC@NJHealth.org

**Daniels, M. Leigh Anne, MD MPH**

University of North Carolina at Chapel Hill  
Department of Medicine  
7213 Marciso Hall  
125 Mason Farm Road  
CB #7248  
Chapel Hill, NC 27599-7248  
Email: [leighanne\\_daniels@med.unc.edu](mailto:leighanne_daniels@med.unc.edu)

**Eden, Edward, MD**

St. Luke's - Roosevelt Hospital Center at Columbia University  
1000 10th Avenue, Suite 3A-55  
New York, NY 10019  
Email: [EEden@chpnet.org](mailto:EEden@chpnet.org)

**Griffith, David, MD**

University of Texas Health Sciences Center at Tyler  
11937 U.S. Hwy. 271  
Tyler, TX 75708-3154  
Email: [David.Griffith@uthct.edu](mailto:David.Griffith@uthct.edu)

**Johnson, Margaret, MD**

Mayo Clinic Florida  
Davis 7a  
4500 San Pablo Rd S  
Jacksonville, FL 32224  
Email: [Johnson.margaret2@mayo.edu](mailto:Johnson.margaret2@mayo.edu)

**Knowles, Michael, MD**

University of North Carolina at Chapel Hill School of Medicine  
7213 Marciso Hall  
125 Mason Farm Road  
CB #7248  
Chapel Hill, NC 27599-7248  
Email: [knowles@med.unc.edu](mailto:knowles@med.unc.edu)

**Metersky, Mark, MD**

University of Connecticut Health Center  
263 Farmington Avenue  
Farmington, CT 06030-1321  
Email: [Metersky@nso.uhc.edu](mailto:Metersky@nso.uhc.edu)

**O'Donnell, Anne, MD**

Georgetown University Hospital  
3800 Reservoir Road, NW  
Washington, DC 20007  
Email: [odonnella@gunet.georgetown.edu](mailto:odonnella@gunet.georgetown.edu)

**Olivier, Kenneth, MD**

National Institute of Allergy and Infectious Diseases (NIAID)  
6610 Rockledge Drive, MSC 6612  
Bethesda, MD 20892-6612  
Email: [olivierk@niaid.nih.gov](mailto:olivierk@niaid.nih.gov)

**Salathe, Matthias, MD**

University of Miami, Miller School of Medicine  
1600 NW 10th Avenue, Room RMSB 7056  
Miami, FL 33136  
Email: [msalathe@med.miami.edu](mailto:msalathe@med.miami.edu)

**Thomashow, Byron, MD**

Columbia University Medical Center - NY Presbyterian Hospital  
Center for Chest Disease  
622 W. 168th Street  
New York, NY10032

**Tino, Greg, MD**

Gregory Tino, M.D.  
Chief, Department of Medicine  
Penn Presbyterian Medical Center  
Associate Professor of Medicine  
University of Pennsylvania School of Medicine  
39th and Market Streets  
Suite W-130  
Philadelphia, PA 19104  
Email: [gregory.tino@uphs.upenn.edu](mailto:gregory.tino@uphs.upenn.edu)

**Turino, Gerard, MD**

Columbia University  
St. Luke's Roosevelt Hospital, Dept. of Medicine  
1000 10<sup>th</sup> Avenue  
New York, NY 10019  
E-mail: [gmt1@columbia.edu](mailto:gmt1@columbia.edu)

**Winthrop, Kevin, MD MPH**

Oregon Health and Science University  
3375 SW Terwilliger Blvd  
Portland, OR 97239  
Email: [winthrop@ohsu.edu](mailto:winthrop@ohsu.edu)
